# Supplementary material for: Prospective Study Investigating the Efficacy and Safety of a Scalp Cooling Device for the Prevention of Alopecia in Women Undergoing (Neo)Adjuvant Chemotherapy for Breast Cancer
Source: MDPI journal article supplement (doi:10.3390/curroncol29100569), 2022-09-30
Supplement: s1 [file s1]

**Table S1.** Hair loss degree, evaluated by medical staff after the last use of scalp cooling, according to the patient characteristics.

| Variable                                         | Hair loss ≤ 50%<br>(Dean score 0-2)<br>N. of Pts (%) | Hair loss > 50%<br>(Dean score 3-4)<br>N. of Pts (%) | <i>p-value</i>                             |
|--------------------------------------------------|------------------------------------------------------|------------------------------------------------------|--------------------------------------------|
| Scalp temperature throughout CT and post-cooling | 128 (80.5)                                           | 31 (19.5)                                            | 0.303 <sup>^</sup>                         |
| 3°                                               | 72 (81.8)                                            | 16 (18.2)                                            |                                            |
| 4°                                               | 43 (75.4)                                            | 14 (24.6)                                            |                                            |
| 5°                                               | 13 (92.9)                                            | 1 (7.1)                                              |                                            |
| Hair thickness                                   | 123 (81.5)                                           | 28 (18.5)                                            | 0.409 <sup>^</sup>                         |
| <i>Fine</i>                                      | 61 (85.9)                                            | 10 (14.1)                                            |                                            |
| <i>Medium</i>                                    | 39 (78)                                              | 11 (22)                                              |                                            |
| <i>Thick</i>                                     | 23 (76.7)                                            | 7 (23.3)                                             |                                            |
| Hair structure                                   | 116 (81.1)                                           | 27 (18.9)                                            | 0.502 <sup>^</sup>                         |
| <i>Straight</i>                                  | 53 (85.5)                                            | 9 (14.5)                                             |                                            |
| <i>Wavy</i>                                      | 43 (78.2)                                            | 12 (21.8)                                            |                                            |
| <i>Curly</i>                                     | 20 (76.9)                                            | 6 (23.1)                                             |                                            |
| Hair density                                     | 124 (80)                                             | 30 (19.5)                                            | 0.805 <sup>^</sup>                         |
| <i>Low</i>                                       | 10 (83.3)                                            | 2 (16.7)                                             |                                            |
| <i>Medium</i>                                    | 80 (81.6)                                            | 18 (18.4)                                            |                                            |
| <i>High</i>                                      | 34 (77.3)                                            | 10 (22.7)                                            |                                            |
| Previous alopecia                                | 129 (80.6)                                           | 31 (19.4)                                            | 0.201 <sup>^^</sup>                        |
| <i>Yes</i>                                       | 17 (94.4)                                            | 1 (5.6)                                              |                                            |
| <i>No</i>                                        | 112 (78.9)                                           | 30 (21.1)                                            |                                            |
| Hair treatment during CT period                  | 115 (85.2)                                           | 20 (14.8)                                            | 0.196 <sup>^^</sup>                        |
| <i>Yes</i>                                       | 21 (95.5)                                            | 1 (4.5)                                              |                                            |
| <i>No</i>                                        | 94 (83.2)                                            | 19 (16.8)                                            |                                            |
| Dose dense schedule                              | 145 (81.5)                                           | 33 (18.5)                                            | 0.771 <sup>^</sup>                         |
| <i>Yes</i>                                       | 36 (80)                                              | 9 (20)                                               |                                            |
| <i>No</i>                                        | 109 (82)                                             | 24 (18)                                              |                                            |
| CT Regimen                                       | 145 (81.5)                                           | 33 (18.5)                                            | 0.067 <sup>^*</sup><br>0.093 <sup>^#</sup> |
| <i>Anthracycline and Taxane</i>                  | 94 (77.7)                                            | 27 (22.3)                                            |                                            |
| <i>Anthracycline and Taxane plus Carboplatin</i> | 6 (85.7)                                             | 1 (14.3)                                             |                                            |
| <i>Docetaxel and Cyclophosphamide</i>            | 41 (89.1)                                            | 5 (10.9)                                             |                                            |
| <i>Paclitaxel alone</i>                          | 4 (100)                                              | 0 (0)                                                |                                            |
| Type of Taxane                                   | 145 (81.5)                                           | 33 (18.5)                                            | 0.489 <sup>^</sup>                         |
| <i>Paclitaxel weekly</i>                         | 31 (79.5)                                            | 8 (20.5)                                             |                                            |
| <i>Paclitaxel q2w</i>                            | 29 (78.4)                                            | 8 (21.6)                                             |                                            |
| <i>Paclitaxel q3w</i>                            | 25 (75.8)                                            | 8 (24.2)                                             |                                            |
| <i>Docetaxel q3w</i>                             | 60 (87)                                              | 9 (13)                                               |                                            |

**Legend – Table S1:** N, number; CT, chemotherapy; \*anthracycline and taxane-/anthracycline and taxane plus carboplatin-based chemotherapy versus docetaxel and cyclophosphamide and paclitaxel alone; #anthracycline and taxane-based chemotherapy versus docetaxel and cyclophosphamide; <sup>^</sup>*p-value*: Pearson's chi-square test; <sup>^^</sup>*p-value*: Fisher's exact test.
